# Supplementary material for: Patterned, morphing composites via maskless photo-click lithography
Source: Royal Society of Chemistry journal article supplement (doi:10.1039/c9sm02056j), 2020-01-01
Supplement: c9sm02056j1.pdf [file c9sm02056j1.pdf]

## Supporting Information

# Patterned, Morphing Composites via Maskless Photo-click Lithography

*Shida Lyu<sup>†</sup>, Fei Zheng<sup>†</sup>, Julio Adrian Aguilar-Tadeo<sup>†</sup>, Fei Lin<sup>†§</sup>, Rui Wu<sup>‡</sup>, Brian Derby<sup>†</sup>, Ian A. Kinloch<sup>†§</sup>, Constantinos Soutis<sup>†‡</sup>, Matthieu Gresil<sup>†‡\*</sup>, Jonny J. Blaker<sup>†\*</sup>*

<sup>†</sup> Department of Materials, The University of Manchester, Manchester, M13 9PL, United Kingdom

<sup>§</sup> National Graphene Institute, The University of Manchester, Manchester, M13 9PL, United Kingdom

<sup>‡</sup> Aerospace Research Institute, The University of Manchester, Manchester, M13 9PL, United Kingdom

### Corresponding Authors:

[matthieu.gresil@manchester.ac.uk](mailto:matthieu.gresil@manchester.ac.uk) and [jonny.blaker@manchester.ac.uk](mailto:jonny.blaker@manchester.ac.uk)

FTIR-ATR spectra were collected with repeated scan times of 64 and a resolution of  $4\text{ cm}^{-1}$ . The appearance of peak at  $944\text{ cm}^{-1}$  in the chitosan-MA curve results from the out of plane deformation of  $-\text{C}=\text{CH}_2$  in the methacrylamide structure. After functionalization, the increased absorbance of the peak at  $1548\text{ cm}^{-1}$  and range of  $560\text{-}650\text{ cm}^{-1}$  come from the amide II band (N-H bending and C-N stretching vibrations) and the bending motion of  $\text{O}=\text{C}-\text{N}$ , respectively <sup>1</sup>.

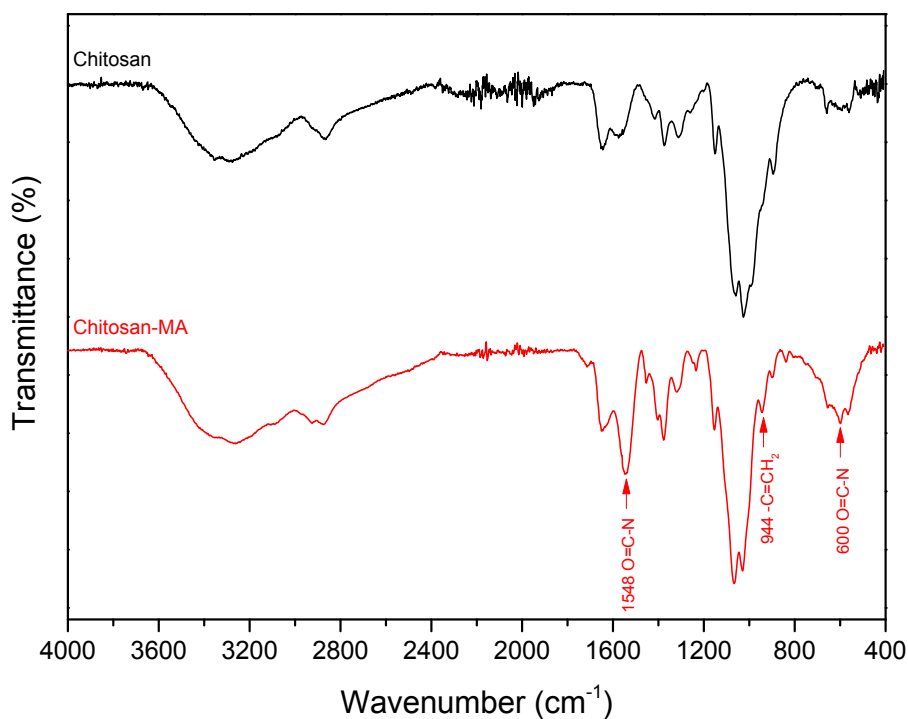

Figure S1: FTIR spectra for chitosan and chitosan-MA.

$^1\text{H}$  NMR spectroscopy was conducted on a Bruker 500 MHz at  $25\text{ }^\circ\text{C}$ . Chitosan and chitosan-MA (0.5% (w/v)) were dissolved in 0.5% deuterium chloride (DCl) in deuterium oxide ( $\text{D}_2\text{O}$ ) at room temperature. The appearance of the proton peaks at 5.28, 5.6 ppm and 1.7-1.9 ppm results from

the  $-C=CH_2$  and  $-C-CH_3$  groups on the methylene binding of the chitosan-MA. The methacrylation degree is determined by the integrated area ratio between the  $-C=CH_2$  of the methylene group at 5.28-5.6 ppm and the H3-H6 peaks of chitosan at 3.3-4.0 ppm<sup>2,3</sup>.

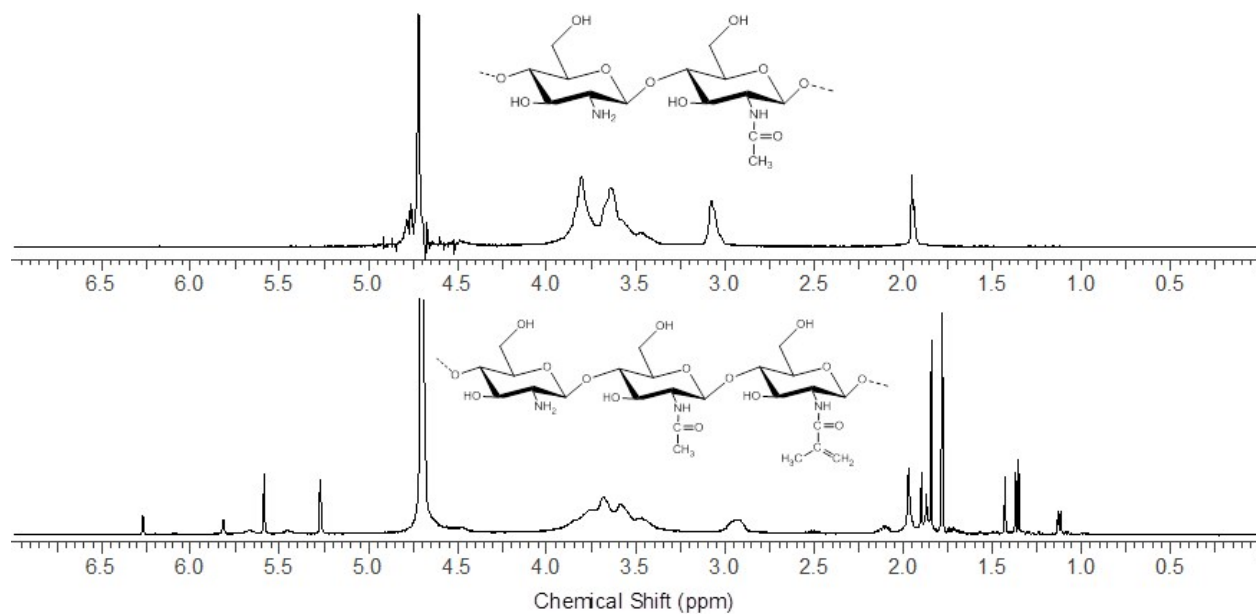

Figure S2: <sup>1</sup>H NMR spectra for chitosan and chitosan-MA

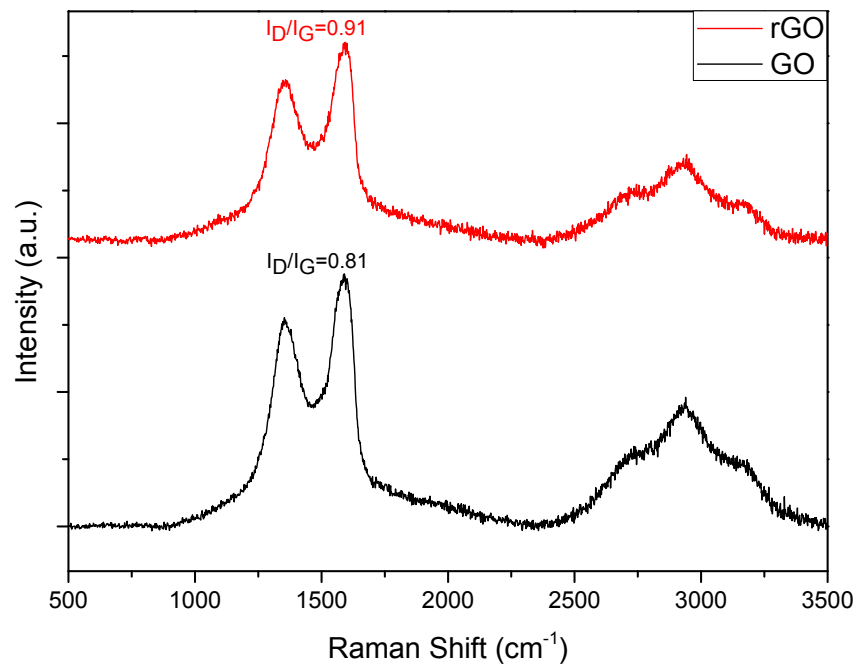

Figure S3: Raman Spectroscopy of GO and rGO

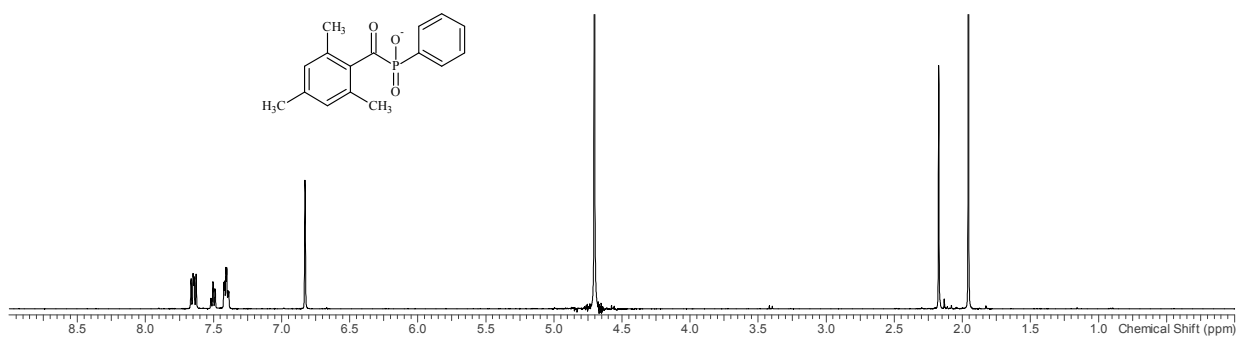

Figure S4: <sup>1</sup>H NMR spectrum for the photoinitiator, LAP

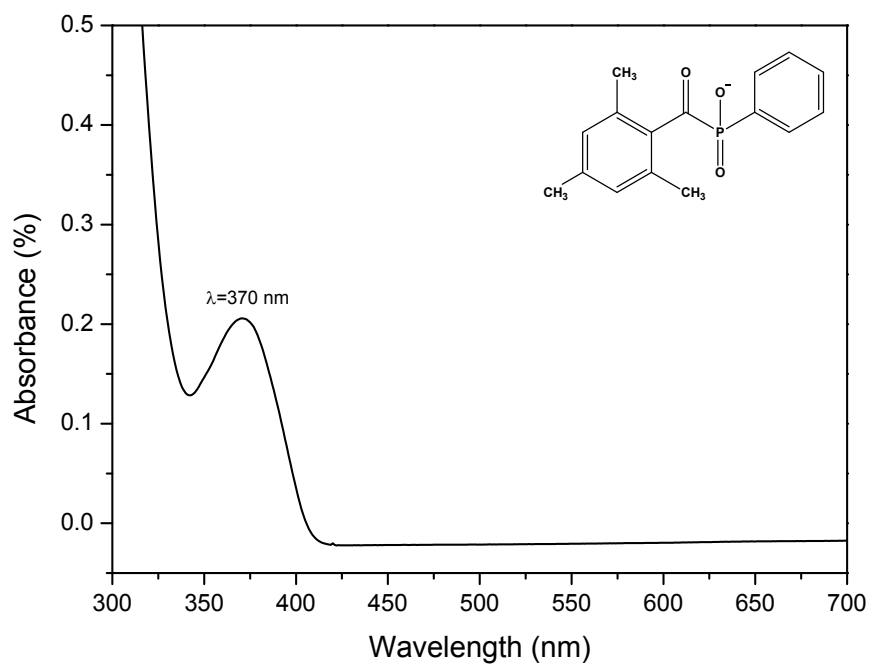

Figure S5: UV-visible spectrum for the photoinitiator, LAP

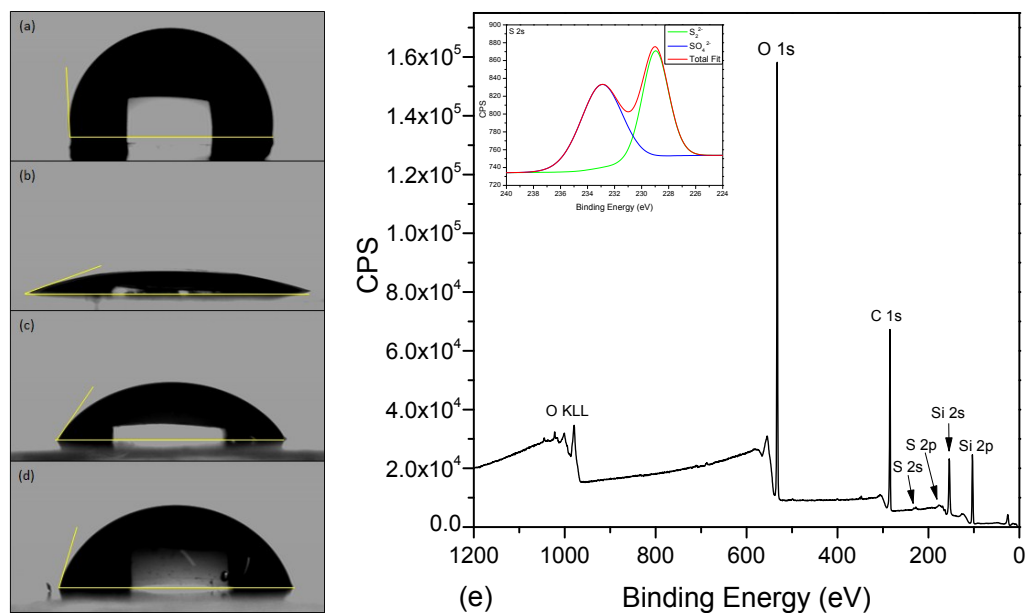

Figure S6: (a) Water-in-air (w/a) contact angle of PDMS surface before plasma. (b-d) w/a contact angle of PDMS surface after plasma treatment in 0 min, 20 min and 120 min, respectively. (e) XPS spectrum of thiolated PDMS (Inset: Deconvoluted XPS of S 2s for thiolated PDMS), the percentage of S 2s is 1.57 atom% on the thiolated PDMS surface. (Due to the overlap issue between primary S 2p and Si 2s in the spectrum, Sulphur content was characterized by S 2s in this study.)

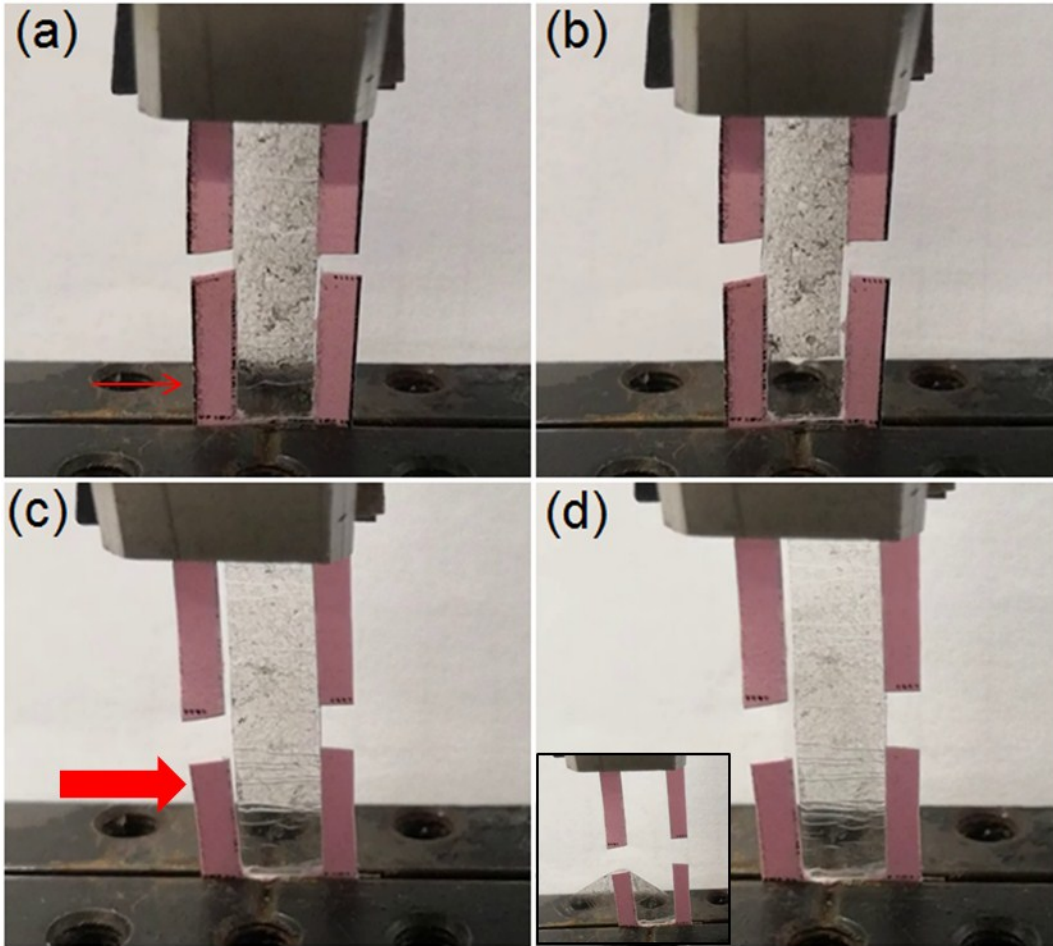

Figure S7: Demonstration of the elongated behaviours during the tensile test for covalent bonded bilayered composite and non-covalent bonded bilayered composite. (a) Stretching process for covalent bonded bilayered composite. Only one major crack happened on the rGO-chitosan-MA layer before the failure of whole composite. (b) The failure point of the covalent bonded bilayered composite. Composite crack went through the rGO-chitosan-MA layer crack. (c) Stretching process for non-covalent bonded bilayered composite. The rGO-chitosan-MA layer split into few parts before PDMS layer cracked. (d) The point before failure of the non-covalent bonded bilayered composite. (Inset: the failure point of the non-covalent bonded bilayered composite. The sample curled back and caused observation difficulty, so the point before failure was used for demonstration. )

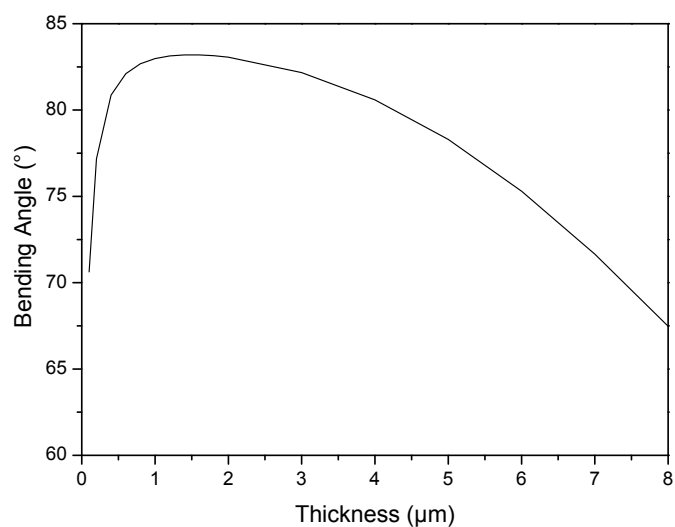

Figure S8: Relationship between the thickness of rGO-chitosan-MA layer and bending angle when PDMS thickness and temperature change remain the same on the basis of thermomechanics study of bimetallic thermostats in Equation (1).

#### REFERENCES

- (1) Socrates, G. *Infrared Characteristic Group Frequencies: Tables and Charts*, Second Edi.; John Wiley & Sons, 1994.
- (2) Valmikinathan, C. M.; Mukhatyar, V. J.; Jain, A.; Karumbaiah, L.; Dasari, M.; Bellamkonda, R. V. Photocrosslinkable Chitosan Based Hydrogels for Neural Tissue Engineering. *Soft Matter* **2012**, *8* (6), 1964–1976.
- (3) Lavertu, M.; Xia, Z.; Serreqi, A. N.; Berrada, M.; Rodrigues, A.; Wang, D.; Buschmann, M. D.; Gupta, A. A Validated <sup>1</sup>H NMR Method for the Determination of the Degree of Deacetylation of Chitosan. *J. Pharm. Biomed. Anal.* **2003**, *32* (6), 1149–1158.
